# Supplementary material
Source: PubMed Central journal article supplement (PMC3514461)
Supplement: NIHMS404410-supplement-1_si_001.pdf [file NIHMS404410-supplement-1_si_001.pdf]

# *Uncoupling Intramolecular Processing and Substrate Hydrolysis in the N-terminal Hydrolase hASRGL-1 by Circular Permutation*

Wenzong Li,<sup>+</sup> Jason R. Cantor,<sup>‡</sup> S. D. Yogesha<sup>‡</sup>, Shirley Yang<sup>‡</sup>, Lynne Chantranupong<sup>‡</sup>, June Qingxia Liu<sup>‡</sup>, Giulia Agnello<sup>¶</sup>, George Georgiou,<sup>‡§¶</sup> Everett M. Stone<sup>\*‡</sup> and Yan Zhang<sup>\*‡¶</sup>

<sup>+</sup>Department of Chemistry and Biochemistry, <sup>‡</sup>Department of Biomedical and Chemical Engineering, <sup>§</sup>Section of Molecular Genetics and Microbiology and <sup>¶</sup>Institute of Cellular and Molecular Biology, University of Texas, Austin, Texas 78712.

RUNNING TITLE: Structure of Human Isoaspartyl Dipeptidase.

\* Address correspondence to: Yan Zhang: 1 University Station A5300, Austin, TX 78712. Phone: (512)-471-8645. Fax: 512-471-9469. E-mail: [jeszhang@mail.utexas.edu](mailto:jeszhang@mail.utexas.edu) or Everett Stone: 1 University Station C0800, Austin, TX 78712. Phone: (512) 512-232-4105. E-mail: [stonesci@mail.utexas.edu](mailto:stonesci@mail.utexas.edu)

**SUPPORTING INFORMATION**

## SUPPORTING FIGURES

**Figure S1.** A) The pH dependence of  $k_{\text{cat}}$  for cp-hASRGL1 hydrolysis of AHA with an apparent  $\text{pK}_a$  of  $6.0 \pm 0.1$ . B) The pH dependence of cp-hASRGL1 hydrolysis of AHA upon  $k_{\text{cat}}/K_M$  with corrected values of  $\text{pK}_{a1} = 7.3 \pm 0.2$  (ascending) and  $\text{pK}_{a2} = 8.0 \pm 0.2$  (descending) limb.

Figure S1

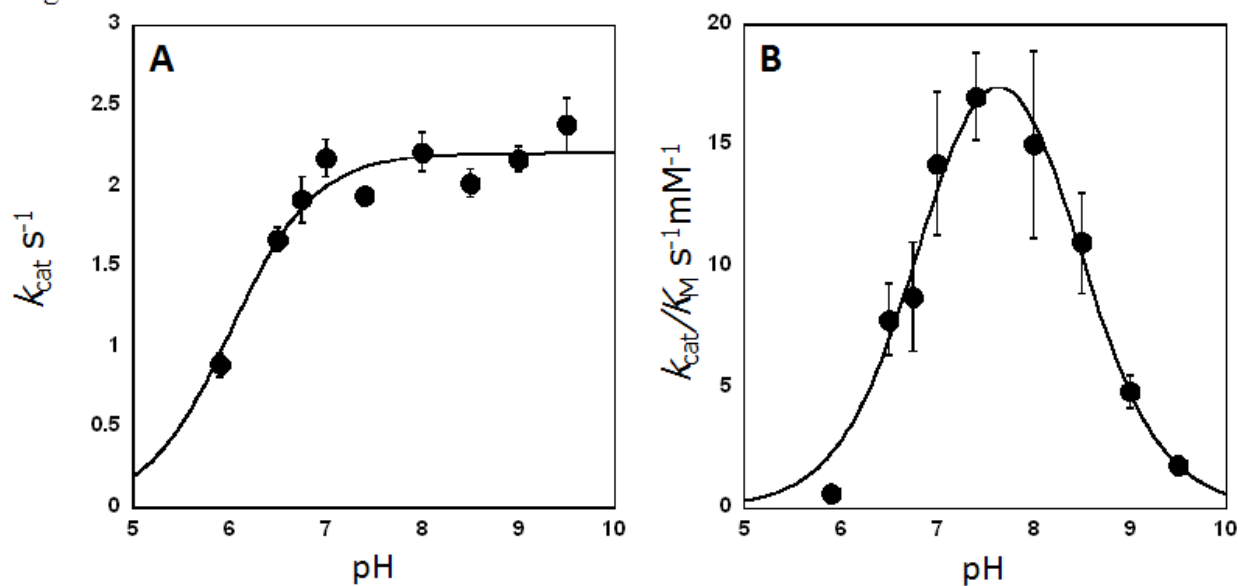

**Figure S2.** Density (Fo-Fc) map of sulfate ion bound in active site. The sulfate ion (shown in stick with sulfur in yellow and oxygen atom in red) is stabilized by hydrogen bonds formed by  $\beta$ -hydroxyl group of Ser200, amide group of Ser 200,  $\gamma$ -carboxyl group of Asp199 and a water molecule (red sphere), and by salt bridges formed by Arg196. The C atoms of hASRGL1 are shown in light blue and the dashed green lines indicate polar interactions. All distances are in the units of Å.

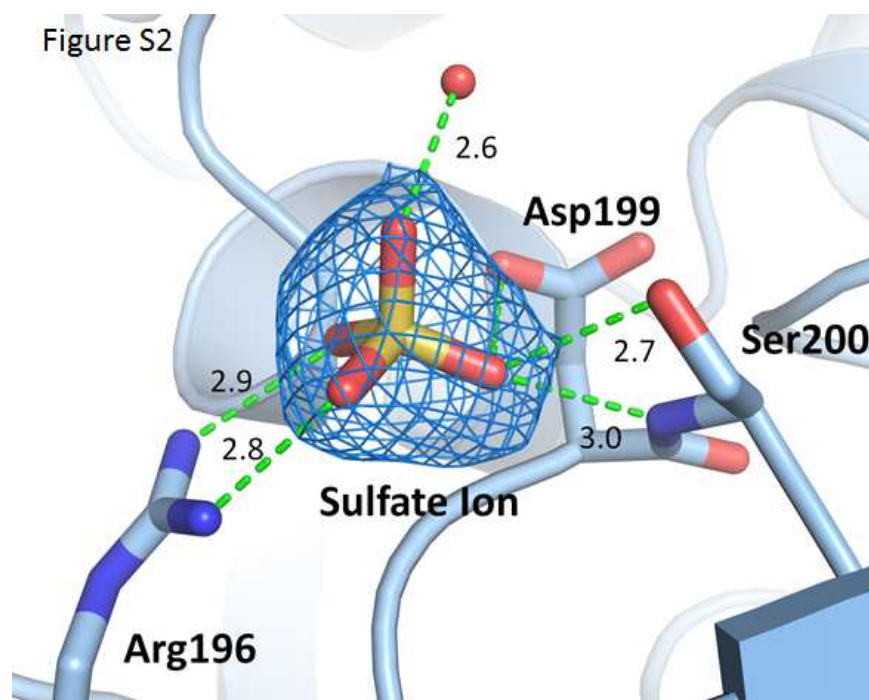



**Figure S4.** Hydrogen bonding around Thr168. cp-hASRGL1 active site nucleophile Thr168 forms hydrogen bonds with  $\beta$ -hydroxyl group Thr219,  $\gamma$ -amide and  $\alpha$ -carbonyl of Asn62, and an intramolecular hydrogen bond between its own  $\alpha$ -amino and  $\beta$ -hydroxyl groups. Dashed green lines indicate the hydrogen bond distances in Å.

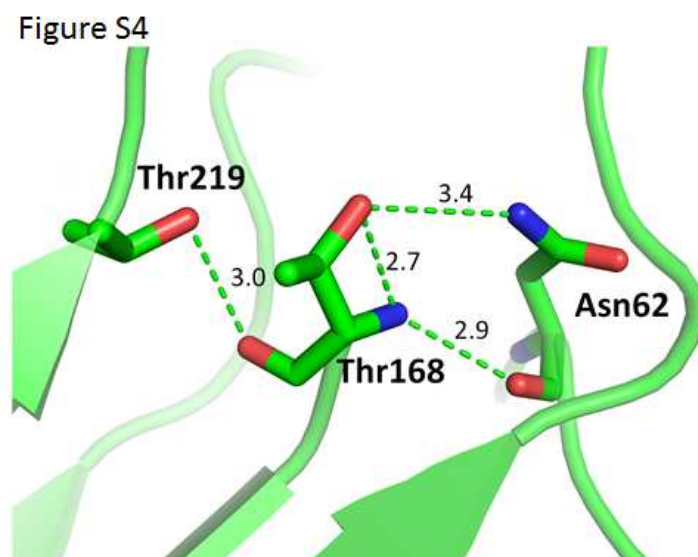

**Figure S5.** Derivative thermal melting curves for hASRGL1 and variants Thr168Ala, and Thr168Ser with  $T_m$  values of  $61.0 \pm 0.1$  C°,  $71.0 \pm 0.1$ °C, and  $71.0 \pm 0.1$ °C respectively. For comparison cp-hASRGL1 was also included with a  $T_m$  value of  $70 \pm 0.1$  C°. The hASRGL1 and hASRGL1 variants color codes are marked on the right side of the plot.

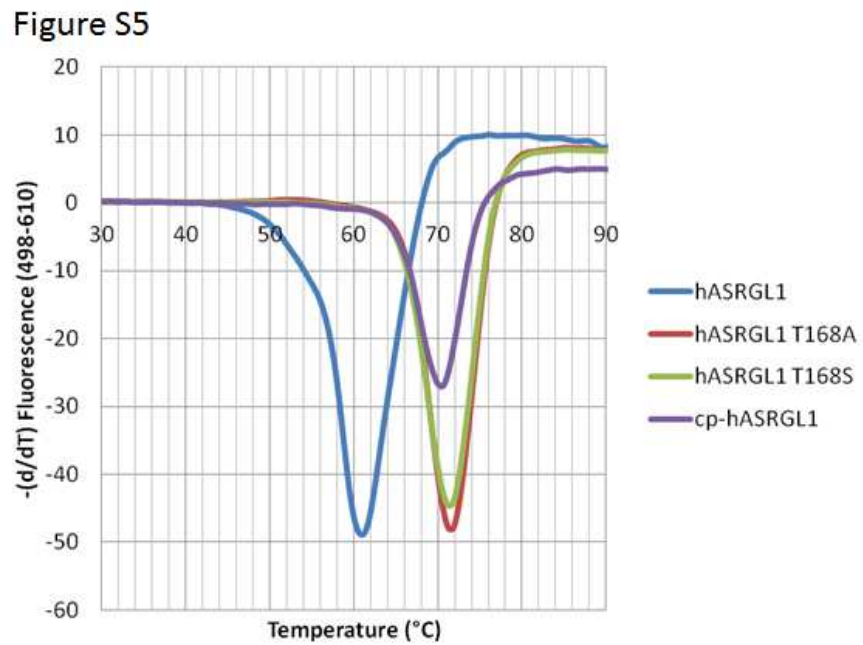

## SUPPORTING TABLES

**Table S1.**

| Table S1<br>ESI-MS analysis of cp-hASRGL1 and variants |                            |                   |
|--------------------------------------------------------|----------------------------|-------------------|
| Variant                                                | Mass (calc)<br>(-Met1) Da. | Mass (exp)<br>Da. |
| cp-hASRGL1-Thr168Cys                                   | 33535                      | 33525 ± 11        |
| cp-hASRGL1                                             | 33533                      | 33523 ± 11        |
| cp-hASRGL1-Thr16Ser                                    | 33519                      | 33513 ± 11        |

**Table S2.**

| Table S2.                                                                                 |                 |                 |                            |
|-------------------------------------------------------------------------------------------|-----------------|-----------------|----------------------------|
| Experimental and calculated $pK_a$ values of cp-hASRGL1 and substrate AHA                 |                 |                 |                            |
|                                                                                           | $pK_{a1}$ (exp) | $pK_{a2}$ (exp) | $pK_a$ (calc) <sup>*</sup> |
| <sup>a</sup> cp-hASRGL1( $k_{cat}$ )                                                      | $6.0 \pm 0.1$   |                 |                            |
| <sup>b</sup> cp-hASRGL1 ( $k_{cat}/K_M$ )                                                 | $7.3 \pm 0.2$   | $8.0 \pm 0.2$   |                            |
| <sup>c</sup> AHA-NH <sub>3</sub> <sup>+</sup> $\leftrightarrow$ AHA-NH <sub>2</sub>       |                 |                 | 8.05                       |
| <sup>d</sup> R-T168-NH <sub>3</sub> <sup>+</sup> $\leftrightarrow$ R-T168-NH <sub>2</sub> |                 |                 | 7.62                       |

<sup>\*</sup>  $pK_a$  values were calculated using software from ChemAxon  
<sup>a</sup>  $pK_a$  of  $k_{cat}$  dependence on pH, <sup>b</sup>  $pK_a$  values of  $k_{cat}/K_M$  dependence on pH, <sup>c</sup>  $pK_a$  of substrate AHA amine, <sup>d</sup>  $pK_a$  of the amine from an N-terminal Thr residue



**Table S3.**

| Table S3(Related to Figure 3)                                                     |        |              |                                         |                                        |
|-----------------------------------------------------------------------------------|--------|--------------|-----------------------------------------|----------------------------------------|
| Summary of Thr168 sidechain interactions modeled into hASRGL1-Thr168Ala structure |        |              |                                         |                                        |
| Thr168 rotamers                                                                   | % obs. | $\chi$ angle | Thr168 $\beta$ -hydroxyl (H-bonds with) | Thr168 $\gamma$ -methyl (clashes with) |
| p form                                                                            | 49     | 59°          | T218 C=O                                | S200 SC                                |
| m form                                                                            | 43     | -61°         | S200 SC, T186 SC                        | S185 C=O, V169 C=O                     |
| t form                                                                            | 8      | -171°        | S185 C=O, S200 SC                       | T218 C=O                               |

C=O = carbonyl, SC = side chain,  $\gamma$ -methyl clashes range from 2.67-2.18 Å

**Table S4.**

---

Table S4  
Oligonucleotides used in the construction of cp-hASRGL1 and point mutant variants

---

|                             |                                                                          |
|-----------------------------|--------------------------------------------------------------------------|
| New N-term-Thr-F            | 5' -CCCTCTAGAAATAATTTTGTTTAACTTTAAGAAGGAGATATACCATGACAGTCGGCGCTGTCGCCCTG |
| $\alpha$ - $\beta$ linker-R | 5' -CCCAGCACCGCTACCGGCACCACTGCCAGCGCCCGGCAGATCGGTTATGGTCGTG              |
| $\alpha$ - $\beta$ linker-F | 5' -GGCGCTGGCAGTGGTGCCGGTAGCGGTGCTGGGggggaatcccatcgttgtggttcatg          |
| New C-Term-R                | 5' -TATGAATTCTCAATGGTGATGGTGATGGTGCCCAAGGTTCTTCTGGCAATCGG                |
| New N-term-Cys-F            | 5' -CCCTCTAGAAATAATTTTGTTTAACTTTAAGAAGGAGATATACCATGtgcGTCGGCGCTGTCGCCCTG |
| New N-term-Ser-F            | 5' -CCCTCTAGAAATAATTTTGTTTAACTTTAAGAAGGAGATATACCATGtccGTCGGCGCTGTCGCCCTG |
| Gly9Ala-F                   | 5' -ATCGTTGTGGTTCATGCAGGCGGAGC-3'                                        |
| Gly9Ala-R                   | 5' -GCTCCGCCTGCATGAACCACAACGAT-3'                                        |
| Gly10Ala-F                  | 5' -CGTTGTGGTTCATGGTGCCGGAGCCGGACCG-3'                                   |
| Gly10Ala-R                  | 5' -CGGTCCGGCTCCGGCACCATGAACCACAACG-3'                                   |
| Gly11Ala-F                  | 5' -GTGGTTCATGGTGCGCAGCCGGACCGATTAGCAAAGATCGTAAAGAACGTGTG-3'             |
| Gly11Ala-R                  | 5' -CACACGTTCTTTACGATCTTTGCTAATCGGTCCGGCTGCGCCACCATGAACCAC-3'            |
| Gly167Ala-F                 | 5' -GATTGCCAGAAGAACCTTGCCACAGTCGGCGCTGTTCGC-3'                           |
| Gly167Ala-R                 | 5' -GCGACAGCGCCGACTGTGGCAAGGTTCTTCTGGCAATC-3'                            |
| Gly167Asp-F                 | 5' -GATTGCCAGAAGAACCTTGACACAGTCGGCGCTGTTCGC-3'                           |
| Gly167Asp-R                 | 5' -GCGACAGCGCCGACTGTGTCAAGGTTCTTCTGGCAATC-3'                            |

---

## **SUPPORTING METHODS**

*Phylogenetic analysis-* Using a Linnaeus Blast algorithm (Geneious) [1] we analyzed 1000 plant-type asparaginase sequences from across all available phylogenies. Sequences from individual organisms and consensus sequences from major classes of organisms were selected for constructing Figure S2 for easy visual comparison of the conserved HGG motif within the plant-type asparaginase family.

## **SUPPLEMENTARY REFERENCES**

1. Drummond, A.J., Ashton, B., Cheung, M., Heled, J., and Kearse, M. (2009). Geneious v4. 8, 2009. Biomatters Ltd., Auckland, New Zealand.
